# Supplementary material
Source: Research Square preprint supplement (doi:10.21203/rs.3.rs-9497793/v1)
Supplement: Supplementary file 1 [file 23418fbe509aea39f075ae56.docx]

This study did not include gel electrophoresis or Western blot experiments, so no relevant uncropped images are available. We have therefore noted this in the supplementary materials section of the submission form.
